# Supplementary material for: Bioinformatic Analysis of the Campylobacter jejuni Type VI Secretion System and Effector Prediction
Source: Front Microbiol. 2021 Jun 29;12:694824. doi: 10.3389/fmicb.2021.694824 (PMC8285248; doi:10.3389/fmicb.2021.694824)
Supplement: Supplementary Table 6 — Core T6SS proteins identified in the C. jejuni genomes under study. [file Table_6.XLSX]

## Sheet: CJE1153-Campygen
Table S10 | BLASTN-homology search and analysis for cje1153 in the local Campylobacter nucleotide database.
Query ID	Subject Genome accession	Strain	Subject length	Expected value	Bitscore	Subject Percentage similarity to Query
cje1153	N/A	488	1233	0.0	2146	0.849565
cje1153	NZ_CM000854.1	1336	1263	0.0	2266	0.89707
cje1153	NZ_LLWL01000004.1	2865	1233	0.0	2146	0.849565
cje1153	NZ_CYRV01000091.1	12502	1233	0.0	2146	0.849565
cje1153	NZ_KK365955.1	20176	1233	0.0	2146	0.849565
cje1153	N/A	43431	1233	0.0	2146	0.849565
cje1153	NZ_CP010306.1	00-1597	1233	0.0	2146	0.849565
cje1153	NZ_CP017029.1	14980A	1233	0.0	2141	0.847585
cje1153	NZ_CP044173.1	AR-0412	1233	0.0	2141	0.847585
cje1153	NZ_CP044169.1	AR-0414	1233	0.0	2255	0.892716
cje1153	NZ_CP019838.1	ATCC 33560	1233	0.0	2218	0.878068
cje1153	NZ_MJWP01000053.1	BCW_3786	1263	0.0	2292	0.907363
cje1153	NZ_MJVF01000049.1	BCW_3787	1263	0.0	2292	0.907363
cje1153	NZ_MJVI01000044.1	BCW_3790	1263	0.0	2292	0.907363
cje1153	NZ_MJVK01000041.1	BCW_3792	1263	0.0	2292	0.907363
cje1153	NZ_MJVL01000009.1	BCW_3794	1263	0.0	2265	0.896675
cje1153	NZ_MJVN01000001.1	BCW_3798	1263	0.0	2270	0.898654
cje1153	NZ_MJVP01000070.1	BCW_3800	1263	0.0	2272	0.899446
cje1153	NZ_MJVQ01000001.1	BCW_3802	1263	0.0	2272	0.899446
cje1153	NZ_MJVS01000024.1	BCW_3805	1263	0.0	2292	0.907363
cje1153	NZ_MJVU01000063.1	BCW_3810	1263	0.0	2272	0.899446
cje1153	NZ_MJXS01000032.1	BCW_4220	1263	0.0	2292	0.907363
cje1153	NZ_MJXT01000041.1	BCW_4222	1263	0.0	2292	0.907363
cje1153	NZ_MJXV01000021.1	BCW_4225	1263	0.0	2292	0.907363
cje1153	NZ_MJXX01000042.1	BCW_4228	1263	0.0	2292	0.907363
cje1153	NZ_MJXY01000055.1	BCW_4229	1263	0.0	2292	0.907363
cje1153	NZ_MJXZ01000063.1	BCW_4231	1263	0.0	2272	0.899446
cje1153	NZ_MJWN01000019.1	BCW_4459	1233	0.0	2141	0.847585
cje1153	NZ_MKBP01000001.1	BCW_5121	1233	0.0	2141	0.847585
cje1153	NZ_MKBT01000014.1	BCW_5125	1233	0.0	2146	0.849565
cje1153	NZ_MKBV01000088.1	BCW_5128	1233	0.0	2152	0.85194
cje1153	NZ_MKCF01000092.1	BCW_5143	1263	0.0	2191	0.867379
cje1153	NZ_MKCF01000035.1	BCW_5143	63	2.22e-22	111	0.043943
cje1153	NZ_MKCH01000042.1	BCW_5145	1233	0.0	2146	0.849565
cje1153	NZ_MKCI01000018.1	BCW_5146	1233	0.0	2146	0.849565
cje1153	NZ_MKCL01000066.1	BCW_5150	1233	0.0	2135	0.84521
cje1153	NZ_MKCL01000065.1	BCW_5150	1263	0.0	2191	0.867379
cje1153	NZ_MKCL01000082.1	BCW_5150	1233	0.0	2135	0.84521
cje1153	NZ_MKEY01000024.1	BCW_5152	1263	0.0	2191	0.867379
cje1153	NZ_MKFB01000067.1	BCW_5156	1263	0.0	2191	0.867379
cje1153	NZ_MKFB01000083.1	BCW_5156	1233	0.0	2135	0.84521
cje1153	NZ_MKFB01000068.1	BCW_5156	1233	0.0	2135	0.84521
cje1153	NZ_MKFC01000084.1	BCW_5157	1233	0.0	2135	0.84521
cje1153	NZ_MKFC01000041.1	BCW_5157	1263	0.0	2191	0.867379
cje1153	NZ_MKFC01000057.1	BCW_5157	1233	0.0	2135	0.84521
cje1153	NZ_MKFC01000040.1	BCW_5157	1233	0.0	2135	0.84521
cje1153	NZ_MKHS01000033.1	BCW_5161	1233	0.0	2146	0.849565
cje1153	NZ_MKHT01000031.1	BCW_5162	1233	0.0	2146	0.849565
cje1153	NZ_MKHW01000036.1	BCW_5170	1233	0.0	2146	0.849565
cje1153	NZ_MKHX01000089.1	BCW_5171	1233	0.0	2146	0.849565
cje1153	NZ_MKHZ01000065.1	BCW_5174	93	4.68e-39	167	0.0661124
cje1153	NZ_MKHZ01000098.1	BCW_5174	1233	0.0	2135	0.84521
cje1153	NZ_MKHZ01000016.1	BCW_5174	63	2.22e-22	111	0.043943
cje1153	NZ_MJXD01000055.1	BCW_6454	1263	0.0	2270	0.898654
cje1153	NZ_MJXE01000043.1	BCW_6456	1263	0.0	2266	0.89707
cje1153	NZ_MJZZ01000041.1	BCW_7438	1233	0.0	2141	0.847585
cje1153	NZ_LISM01000001.1	BJ-CJD120	1233	0.0	2141	0.847585
cje1153	NZ_LISK01000014.1	BJ-CJD63	1233	0.0	2152	0.85194
cje1153	NZ_JYDY01000030.1	C10-448	1263	0.0	2270	0.898654
cje1153	NZ_JYDZ01000044.1	C12-5524	1263	0.0	2255	0.892716
cje1153	NZ_JYDX01000025.1	C1-5523	1233	0.0	2222	0.879652
cje1153	NZ_JYDX01000056.1	C1-5523	49	2.9e-16	91.6	0.0362629
cje1153	NZ_CP028185.1	CFSAN054107	1233	0.0	2141	0.847585
cje1153	NZ_PIBF01000003.1	CFSAN065298	1233	0.0	2152	0.85194
cje1153	NZ_PIBC01000012.1	CFSAN065301	1233	0.0	2141	0.847585
cje1153	NZ_PIAZ01000002.1	CFSAN065305	1233	0.0	2146	0.849565
cje1153	NZ_PIAY01000008.1	CFSAN065306	1233	0.0	2146	0.849565
cje1153	NZ_PIAX01000001.1	CFSAN065307	1233	0.0	2146	0.849565
cje1153	NZ_PIAC01000002.1	CFSAN065331	1233	0.0	2255	0.892716
cje1153	NZ_PHZV01000021.1	CFSAN065338	1263	0.0	2333	0.923595
cje1153	NZ_PHZQ01000010.1	CFSAN065343	1233	0.0	2255	0.892716
cje1153	NZ_PHZM01000005.1	CFSAN065347	1233	0.0	2146	0.849565
cje1153	NZ_PHZJ01000004.1	CFSAN065350	1233	0.0	2141	0.847585
cje1153	NZ_PHZF01000001.1	CFSAN065354	1152	0.0	2095	0.829375
cje1153	NZ_PHZD01000023.1	CFSAN065356	1233	0.0	2141	0.847585
cje1153	NZ_PHZC01000003.1	CFSAN065357	1233	0.0	2141	0.847585
cje1153	NZ_PHZB01000007.1	CFSAN065358	1233	0.0	2141	0.847585
cje1153	NZ_PHZA01000016.1	CFSAN065360	1152	0.0	2087	0.826207
cje1153	NZ_PHYZ01000001.1	CFSAN065361	1233	0.0	2141	0.847585
cje1153	NZ_PHYY01000002.1	CFSAN065362	1152	0.0	2095	0.829375
cje1153	NZ_PHYW01000002.1	CFSAN065364	1233	0.0	2141	0.847585
cje1153	NZ_PHYV01000004.1	CFSAN065365	1233	0.0	2141	0.847585
cje1153	NZ_PHYU01000002.1	CFSAN065366	1233	0.0	2146	0.849565
cje1153	NZ_PHYS01000001.1	CFSAN065368	1233	0.0	2141	0.847585
cje1153	NZ_PHYO01000009.1	CFSAN065372	1233	0.0	2255	0.892716
cje1153	NZ_PHYA01000003.1	CFSAN065386	1233	0.0	2255	0.892716
cje1153	NZ_PHXZ01000001.1	CFSAN065387	1233	0.0	2255	0.892716
cje1153	NZ_PHXY01000008.1	CFSAN065388	1233	0.0	2255	0.892716
cje1153	NZ_PHXU01000002.1	CFSAN065392	1233	0.0	2255	0.892716
cje1153	NZ_PHXT01000009.1	CFSAN065393	1233	0.0	2255	0.892716
cje1153	NZ_PHXQ01000010.1	CFSAN065396	1233	0.0	2255	0.892716
cje1153	NZ_PHXO01000005.1	CFSAN065399	1263	0.0	2333	0.923595
cje1153	NZ_PHXG01000002.1	CFSAN065407	1233	0.0	2152	0.85194
cje1153	NZ_PHXF01000004.1	CFSAN065408	1233	0.0	2141	0.847585
cje1153	NZ_PHXE01000006.1	CFSAN065409	1233	0.0	2152	0.85194
cje1153	NZ_PITS01000001.1	CFSAN065411	1233	0.0	2152	0.85194
cje1153	NZ_PHXC01000037.1	CFSAN065412	1233	0.0	2146	0.849565
cje1153	NZ_PHXB01000006.1	CFSAN065413	1233	0.0	2146	0.849565
cje1153	NZ_PHXA01000001.1	CFSAN065414	1152	0.0	2095	0.829375
cje1153	NZ_CP012212.1	CJ017CCUA	1263	0.0	2278	0.901821
cje1153	NZ_CP012221.1	CJ018CCUA	1233	0.0	2146	0.849565
cje1153	NZ_CP012217.1	CJ071CC464	1233	0.0	2146	0.849565
cje1153	NZ_CP034393.1	CLB104	1263	0.0	2191	0.867379
cje1153	NZ_CP022076.1	FDAARGOS_262	1233	0.0	2218	0.878068
cje1153	NZ_CP023866.1	FDAARGOS_421	1263	0.0	2333	0.923595
cje1153	NZ_CP017863.1	IF1100	1233	0.0	2146	0.849565
cje1153	NZ_NFND01000008.1	isolate_W30	1233	0.0	2244	0.888361
cje1153	NZ_LISQ01000002.1	JL-CJHLIU1-1	1233	0.0	2152	0.85194
cje1153	NZ_CP017033.1	MTVDSCj16	1233	0.0	2141	0.847585
cje1153	NZ_CP045048.1	NADC 20827	1233	0.0	2141	0.847585
cje1153	NZ_LR134498.1	NCTC13265	1263	0.0	2326	0.920823
cje1153	NZ_LR134497.1	NCTC13268	1233	0.0	2141	0.847585
cje1153	NZ_CUKD01000005.1	OXC6256	1233	0.0	2152	0.85194
cje1153	NZ_CUOL01000017.1	OXC6433	1233	0.0	2141	0.847585
cje1153	NZ_CUOP01000002.1	OXC6435	1233	0.0	2141	0.847585
cje1153	NZ_CUPA01000001.1	OXC6458	1233	0.0	2146	0.849565
cje1153	NZ_CUPJ01000002.1	OXC6466	1233	0.0	2141	0.847585
cje1153	NZ_CUQE01000002.1	OXC6486	1233	0.0	2152	0.85194
cje1153	NZ_CURC01000002.1	OXC6507	1233	0.0	2146	0.849565
cje1153	NZ_CUSA01000001.1	OXC6529	1263	0.0	2191	0.867379
cje1153	NZ_CUSO01000001.1	OXC6542	1233	0.0	2141	0.847585
cje1153	NZ_CUTM01000013.1	OXC6546	1233	0.0	2141	0.847585
cje1153	NZ_CUUZ01000001.1	OXC6550	1233	0.0	2146	0.849565
cje1153	NZ_CUST01000001.1	OXC6555	1233	0.0	2146	0.849565
cje1153	NZ_CTRS01000001.1	OXC6586	1240	0.0	2217	0.877672
cje1153	NZ_CUUV01000001.1	OXC6610	1233	0.0	2141	0.847585
cje1153	NZ_CUVR01000001.1	OXC6631	1233	0.0	2206	0.873317
cje1153	NZ_CUVR01000016.1	OXC6631	92	1.68e-38	165	0.0653207
cje1153	NZ_CUVR01000013.1	OXC6631	62	8e-22	110	0.0435471
cje1153	NZ_CUVW01000002.1	OXC6635	1233	0.0	2141	0.847585
cje1153	NZ_CYQP01000027.1	RC168	1233	0.0	2141	0.847585
cje1153	NZ_CYQQ01000041.1	RC169 isolate	1233	0.0	2135	0.84521
cje1153	NZ_CYQY01000048.1	RC270	1233	0.0	2141	0.847585
cje1153	NZ_CYRN01000129.1	RC427	1233	0.0	2141	0.847585
cje1153	NZ_CYRU01000040.1	RC517	1233	0.0	2141	0.847585
cje1153	NZ_CP017860.1	TS1218	1233	0.0	2135	0.84521
cje1153	NZ_CP041584.1	YH003	1233	0.0	2255	0.892716
cje1153	NZ_CP017859.1	YQ2210	1233	0.0	2141	0.847585
cje1153	NZ_CP017856.1	ZP3204	1233	0.0	2141	0.847585
cje1153	NZ_CZIP01000017.1	18_S17	1233	0.0	2146	0.849565
cje1153	NZ_CZHJ01000029.1	20_S19	1233	0.0	2141	0.847585
cje1153	NZ_CZHW01000024.1	21_S20	1233	0.0	2141	0.847585
cje1153	NZ_CZIR01000030.1	26_S25	1263	0.0	2191	0.867379
cje1153	NZ_CZHL01000038.1	36_S35	1233	0.0	2141	0.847585
cje1153	NZ_CZHQ01000014.1	46_S44	1233	0.0	2146	0.849565
cje1153	NZ_KK365689.1	Cj5	1233	0.0	2146	0.849565
cje1153	NZ_KQ950152.1	HB-CJGB-XWM	1233	0.0	2146	0.849565
cje1153	NZ_CP007749.1	M129	1233	0.0	2255	0.892716
cje1153	NZ_LN831025.1	NCTC11351	1233	0.0	2218	0.878068
cje1153	NZ_JH376988.1	NW	1263	0.0	2333	0.923595
cje1153	NZ_AKFN01000182.1	P854	1233	0.0	2141	0.847585
cje1153	NC_003912.7	RM1221	1263	0.0	2333	0.923595
